# Supplementary material for: New 55Co-labeled Albumin-Binding Folate Derivatives as Potential PET Agents for Folate Receptor Imaging
Source: PubMed Central journal article supplement (PMC6958329; doi:10.3390/ph12040166), 2019-11-08
Supplement: pharmaceuticals-12-00166-s001.pdf [file pharmaceuticals-12-00166-s001.pdf]

Article

# New $^{55}\text{Co}$ -labeled Albumin-binding Folate Derivatives as Potential PET Agents for Folate Receptor Imaging

Lauren L. Radford<sup>1</sup>, Solana Fernandez<sup>1</sup>, Rebecca Beacham<sup>1</sup>, Retta El Sayed<sup>1</sup>, Renata Farkas<sup>2</sup>, Martina Benešová<sup>2,3</sup>, Cristina Müller<sup>2,3</sup>, Suzanne E. Lapi<sup>1,4\*</sup>

<sup>1</sup> Department of Radiology, University of Alabama at Birmingham, Birmingham, AL 35233, United States; lauren.radford@curiumpharma.com (L.L.R.); sfernandez@uabmc.edu (S.F.); beachambecca@gmail.com (R.B.); relsay2@emory.edu (R.E.S.)

<sup>2</sup> Center for Radiopharmaceutical Sciences ETH-PSI-USZ, Paul Scherrer Institute, 5232 Villigen-PSI, Switzerland; dr.renata.farkas@gmail.com (R.F.); m.benesova@dkfz-heidelberg.de (M.B.); cristina.mueller@psi.ch (C.M.)

<sup>3</sup> Department of Chemistry and Applied Biosciences, ETH Zurich, 8093 Zurich, Switzerland

<sup>4</sup> Department of Chemistry, University of Alabama at Birmingham, Birmingham, AL 35205, United States

\* Correspondence: lapi@uab.edu

## Supplemental data for in vitro stability in mouse serum

Representative chromatograms of  $^{55}\text{Co}$ ]Co-cm10 and  $^{55}\text{Co}$ ]Co-rf42 after incubation at 37 °C in mouse serum over a period of 24 h.

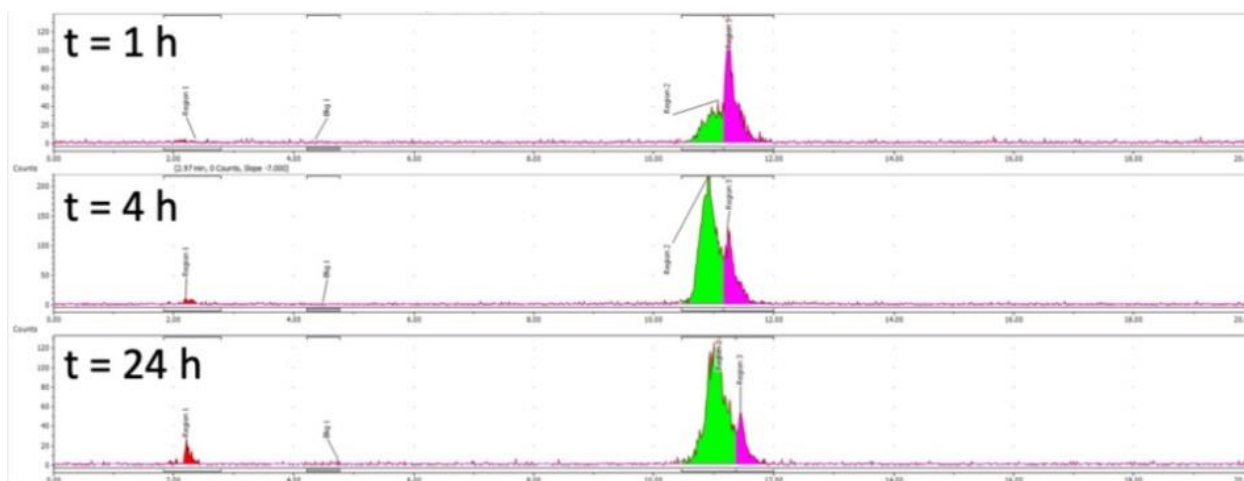

Figure S1. HPLC chromatograms of  $^{55}\text{Co}$ ]Co-cm10 after incubation in mouse serum at 37 °C for 1 h, 4 h and 24 h. The area highlighted in pink is the retention time of the original complex ( $t_R = 11.3$  min). The area highlighted in green shows the ingrowth of a new peak ( $t_R = 11$  min). Free  $^{55}\text{Co}$ ]CoCl<sub>2</sub> elutes at the beginning of the chromatogram ( $t_R = 2.2$  min).

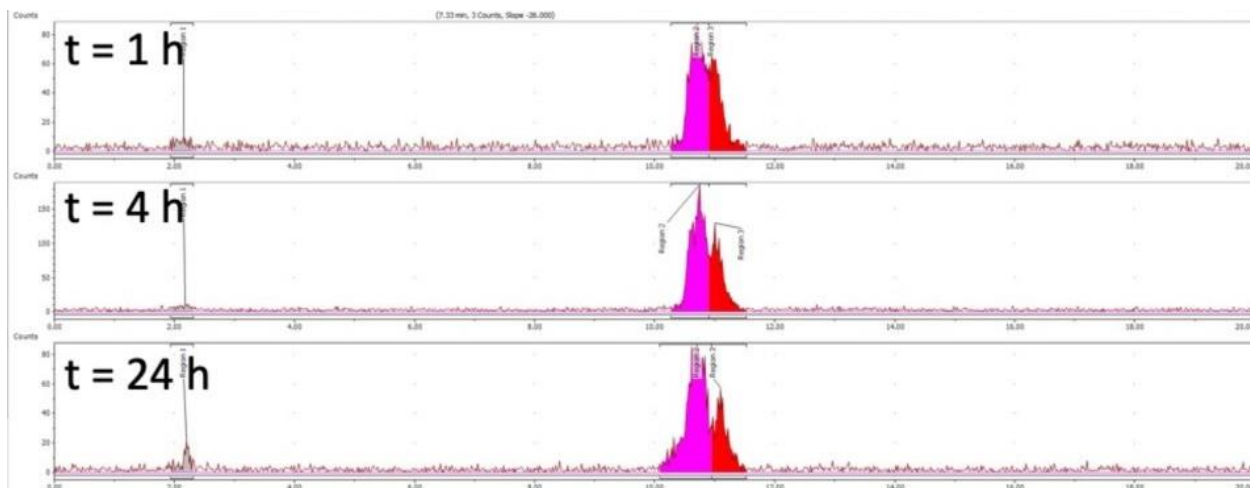

Figure S2. HPLC chromatograms of  $[^{55}\text{Co}]\text{Co-rf42}$  after incubation in mouse serum at 37 °C for 1 h, 4 h and 24 h. The area highlighted in pink is the retention time of the original complex ( $t_{\text{R}} = 10.7\text{ min}$ ). The area highlighted in red shows the ingrowth of a new peak ( $t_{\text{R}} = 10.9\text{ min}$ ). Free  $[^{55}\text{Co}]\text{CoCl}_2$  elutes at the beginning of the chromatogram ( $t_{\text{R}} = 2.2\text{ min}$ ).
